# Supplementary material for: Hierarchical architecture of WO3nanosheets by self-assembly of nanorods for photoelectrochemical applications
Source: Royal Society of Chemistry journal article supplement (doi:10.1039/c5ce01484k), 2015-09-24
Supplement: c5ce01484k1.pdf [file c5ce01484k1.pdf]

Supporting Information

## Hierarchical architecture of $\text{WO}_3$ nanosheets by self-assembly of Nanorods for photoelectrochemical application

Tao Zhang, Jinzhan Su\* and Liejin Guo\*

International Research Center for Renewable Energy, State Key Laboratory of Multiphase Flow,  
Xi'an Jiaotong University, Xi'an, Shaanxi 710049, P. R. China

E-mail: [j.su@mail.xjtu.edu.cn](mailto:j.su@mail.xjtu.edu.cn); [lj-guo@mail.xjtu.edu.cn](mailto:lj-guo@mail.xjtu.edu.cn).

### Results and discussion:

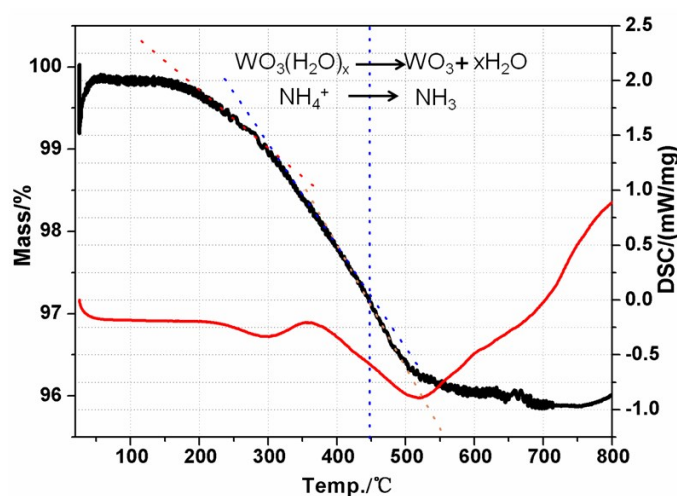

Fig.S1 TGA and DSC thermograms of the as-prepared hierarchical  $\text{WO}_3(\text{H}_2\text{O})_x$  at a heating rate of 10 °C /min in air atmosphere.

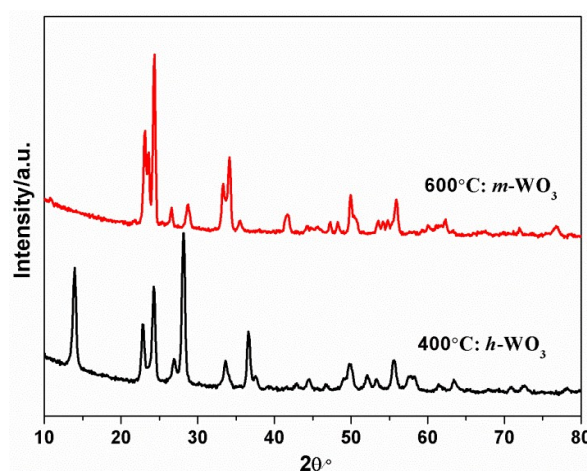

Fig.S2 XRD patterns of the hierarchical  $\text{WO}_3$  obtained by different annealing temperatures of 400 °C and 600 °C.

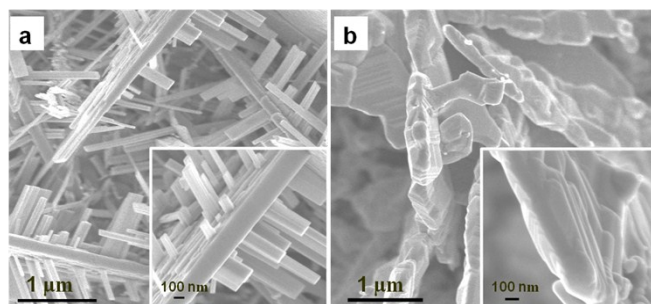

Fig.S3 SEM images of the  $\text{WO}_3$  samples obtained by different annealing temperatures of (a) 400°C and (b) 600°C.

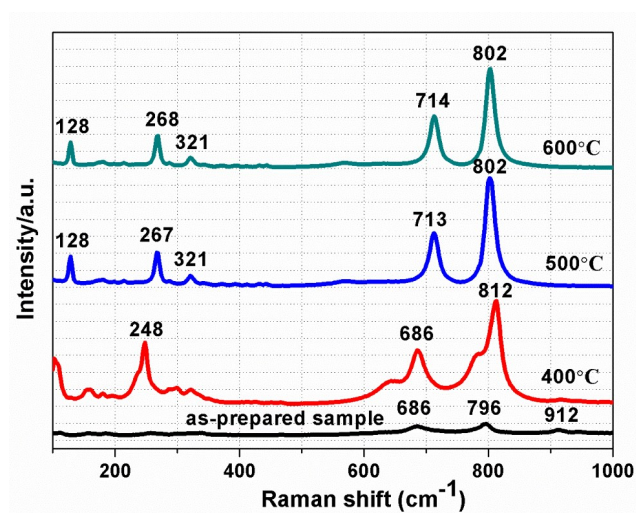

Fig.S4 The Raman spectra of the as-prepared hierarchical sample and obtained  $\text{WO}_3$  by annealing different temperatures: 400°C, 500°C and 600°C.

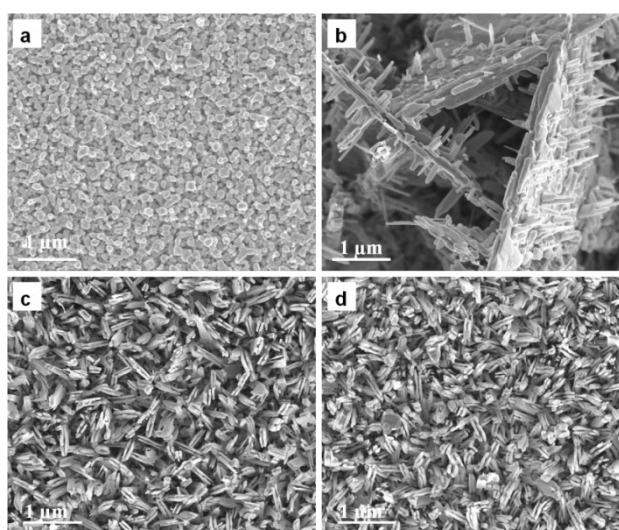

Fig.S5 The SEM images of the  $\text{WO}_3$  samples obtained with concentrated hydrochloric acid of (a)2ml, (b)4ml, (c)6ml and (d)8ml added in the precursor, respectively. (All the samples have been annealed with 500°C under air condition)

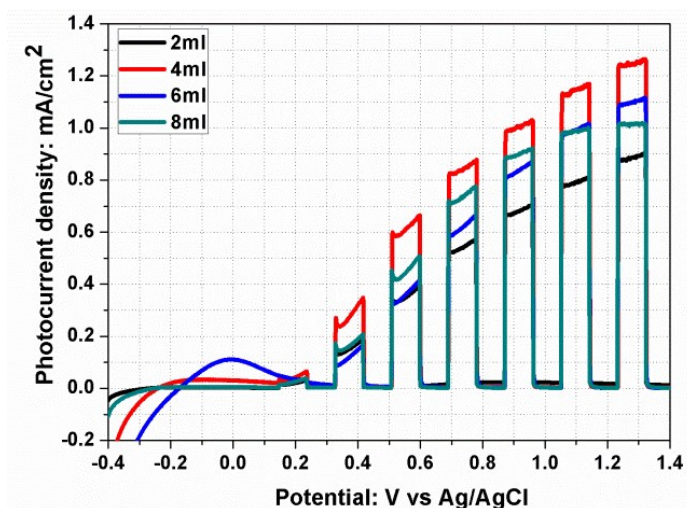

Fig.S6 The PEC performance of the  $\text{WO}_3$  samples obtained with concentrated hydrochloric acid (2ml-8ml) added in the precursor, respectively. (All the samples have been annealed with  $500^\circ\text{C}$  under air condition)

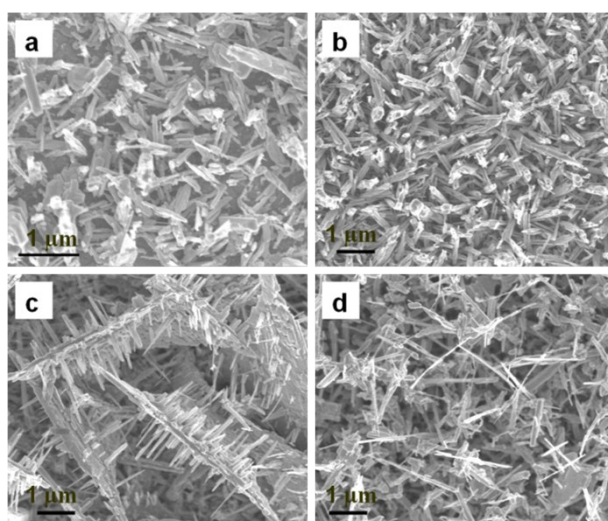

Fig.S7 The SEM images of the  $\text{WO}_3$  samples obtained with different amount of capping agent of (a) 0.5mmol, (b) 1.0mmol, (c) 2.0mmol and (d) 3.0mmol added in the precursor, respectively. (All the samples have been annealed with  $500^\circ\text{C}$  under air condition)

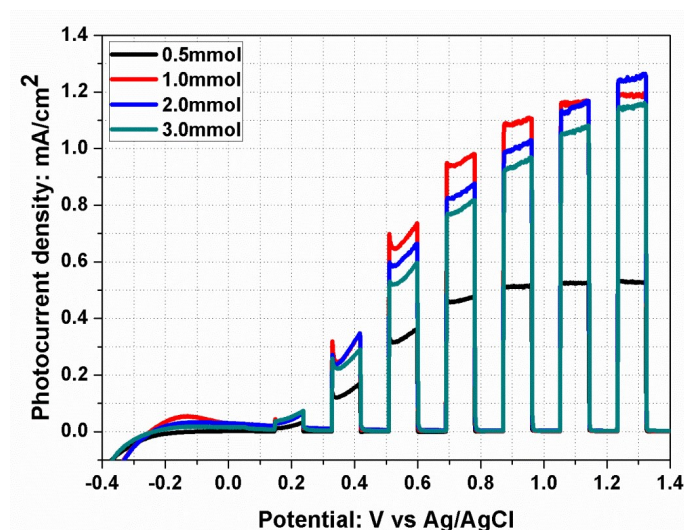

Fig.S8 The PEC performance of the  $\text{WO}_3$  samples obtained with different amount of capping agent (0.5mmol-3.0mmol) added in the precursor, respectively. (All the samples have been annealed with  $500^\circ\text{C}$  under air condition)
